# Supplementary material
Source: Springer Nature journal article supplement (https://www.springermedizin.de/resource/supplementary/13256_2010_1247_MOESM4_ESM.pdf/9647332)

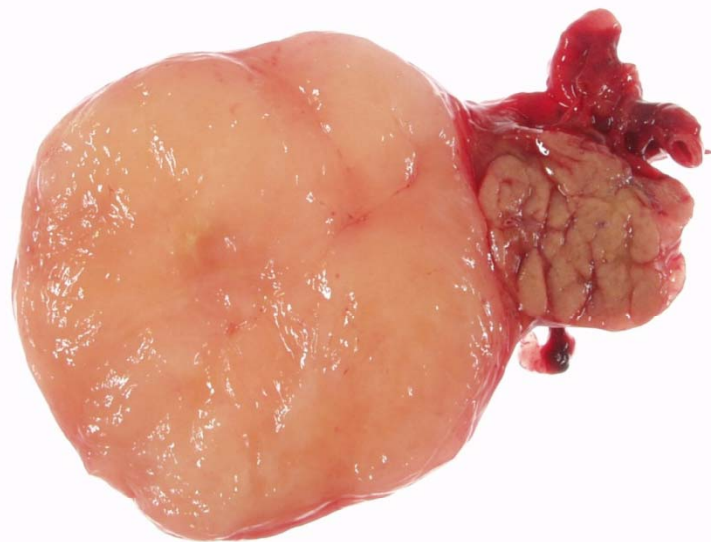

15 16 17 085154 23 24 25 26

4A

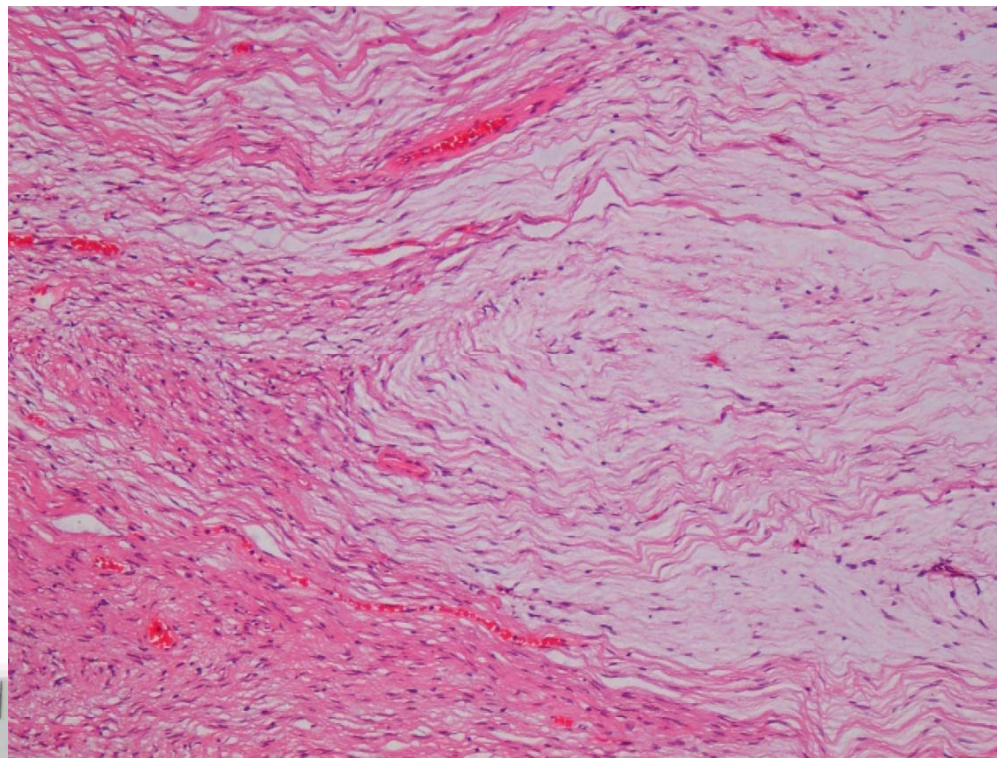

4B

Supplement: MOESM4 [file 9647332]
